# Supplementary material for: Escaping the OR: A Pilot Study of a Jigsaw-Based Workshop to Teach Preoperative Assessment in Internal Medicine Residency
Source: Research Square preprint supplement (doi:10.21203/rs.3.rs-7688150/v1), 2025-11-04
Supplement: Supplementary file 2 [file 2e2e6206207d4d604b2b93af.pdf]

Age: 14 ⓘ

Age:

30

28

31

28

28

29

29

30

29

Pooja Pandita

31

29

28

Gender 14 ⓘ

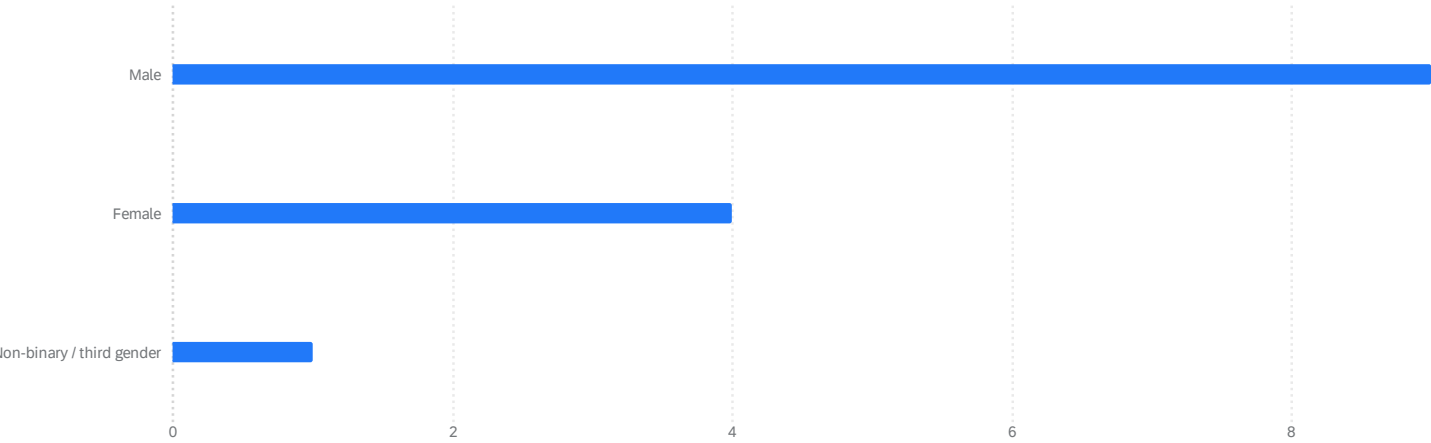

Gender 14 ⓘ

| Q2 - Gender               | Count | Count |
|---------------------------|-------|-------|
| Male                      | 64%   | 9     |
| Female                    | 29%   | 4     |
| Non-binary / third gender | 7%    | 1     |

Gender 14 ⓘ

| Q2 - Gender               | Average (Q2 - Gender) | Minimum (Q2 - Gender) | Maximum (Q2 - Gender) | Count |
|---------------------------|-----------------------|-----------------------|-----------------------|-------|
| Female                    | 2.00                  | 2.00                  | 2.00                  | 4     |
| Male                      | 1.00                  | 1.00                  | 1.00                  | 9     |
| Non-binary / third gender | 3.00                  | 3.00                  | 3.00                  | 1     |

Ethnicity (Check all that apply): 14 ⓘ

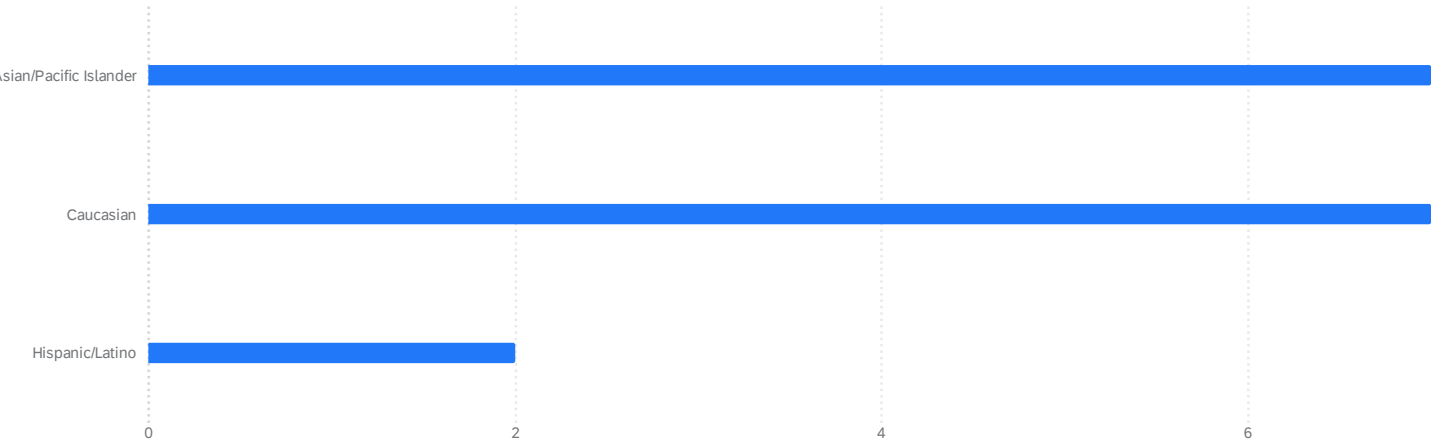

Ethnicity (Check all that apply): 14 ⓘ

| Q3 - Ethnicity (Check all that apply): | Count | Count |
|----------------------------------------|-------|-------|
| Asian/Pacific Islander                 | 50%   | 7     |
| Caucasian                              | 50%   | 7     |
| Hispanic/Latino                        | 14%   | 2     |

Please indicate your PGY year: 14 ⓘ

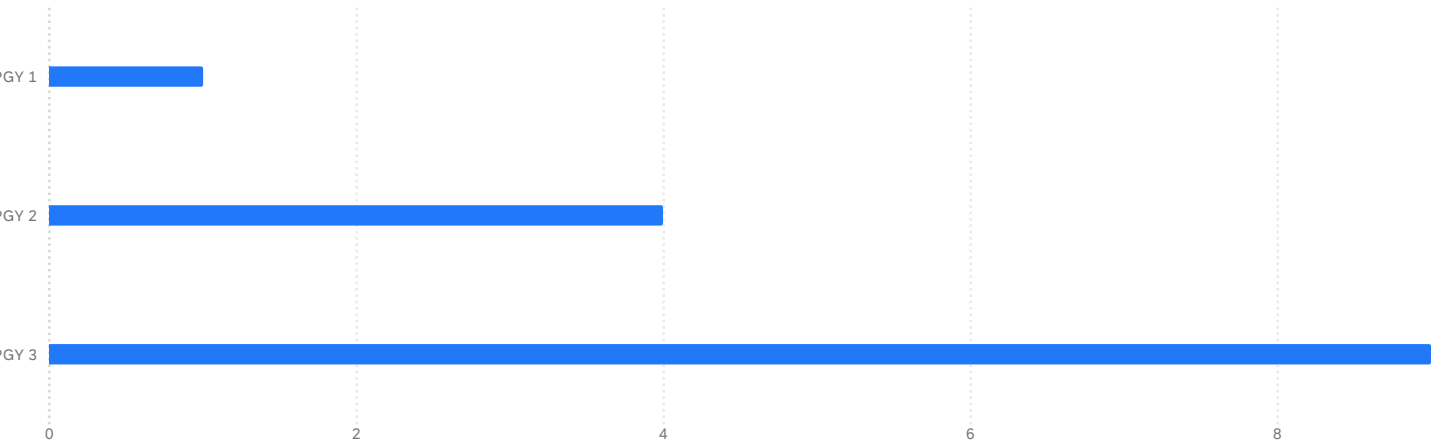

Please indicate your PGY year: 14 ⓘ

| Q4 - Please indicate your PGY year: | Count | Count |
|-------------------------------------|-------|-------|
| PGY 1                               | 7%    | 1     |
| PGY 2                               | 29%   | 4     |
| PGY 3                               | 64%   | 9     |

Please indicate your PGY year: 14 ⓘ

| Q4 - Please indicate your PGY year: | Average (Q4 - Please indicate your PGY year:) | Minimum (Q4 - Please indicate your PGY year:) | Maximum (Q4 - Please indicate your PGY year:) | Count |
|-------------------------------------|-----------------------------------------------|-----------------------------------------------|-----------------------------------------------|-------|
| PGY 1                               | 1.00                                          | 1.00                                          | 1.00                                          | 1     |
| PGY 2                               | 2.00                                          | 2.00                                          | 2.00                                          | 4     |
| PGY 3                               | 3.00                                          | 3.00                                          | 3.00                                          | 9     |

Have you received training in ambulatory preoperative assessment in the following settings? 14 ⓘ

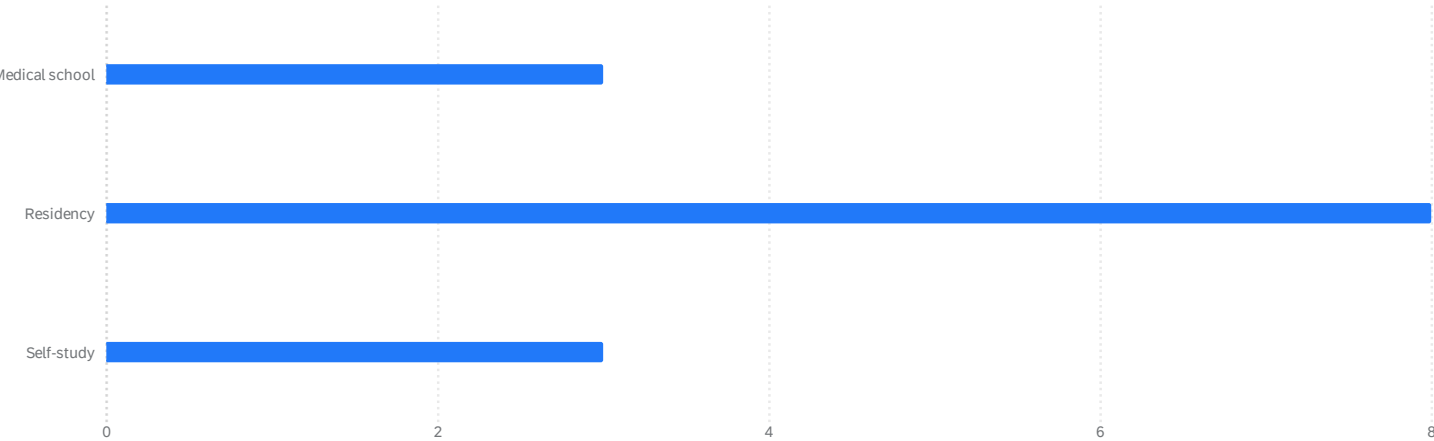

Have you received training in ambulatory preoperative assessment in the following settings? 14 ⓘ

| Q5 - Have you received training in ambulatory preoperative assessment in the following settings? | Count | Count |
|--------------------------------------------------------------------------------------------------|-------|-------|
| Medical school                                                                                   | 21%   | 3     |
| Residency                                                                                        | 57%   | 8     |
| Self-study                                                                                       | 21%   | 3     |

Have you received training in ambulatory preoperative assessment in the following settings? 14 ⓘ

| Q5 - Have you received training in ambulatory preoperative assessment in the following settings? | Average (Q5 - Have you received training in ambulatory preoperative assessment in the following settings?) | Minimum (Q5 - Have you received training in ambulatory preoperative assessment in the following settings?) | Maximum (Q5 - Have you received training in ambulatory preoperative assessment in the following settings?) | Count |
|--------------------------------------------------------------------------------------------------|------------------------------------------------------------------------------------------------------------|------------------------------------------------------------------------------------------------------------|------------------------------------------------------------------------------------------------------------|-------|
| Medical school                                                                                   | 2.00                                                                                                       | 2.00                                                                                                       | 2.00                                                                                                       | 3     |
| Residency                                                                                        | 4.00                                                                                                       | 4.00                                                                                                       | 4.00                                                                                                       | 8     |
| Self-study                                                                                       | 5.00                                                                                                       | 5.00                                                                                                       | 5.00                                                                                                       | 3     |

Have you received training in inpatient preoperative assessment in the following settings? 14 ⓘ

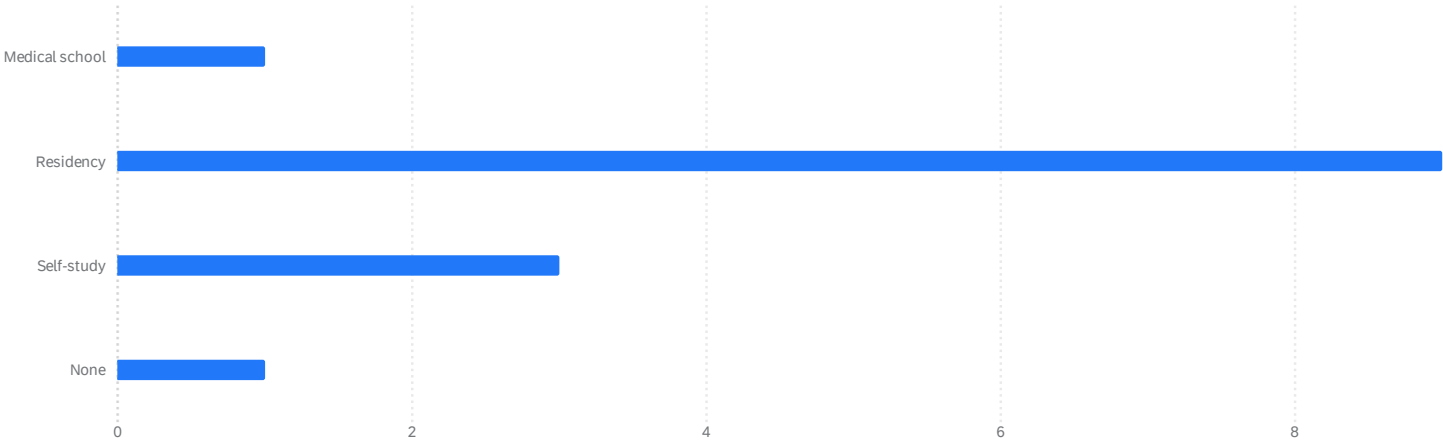

Have you received training in inpatient preoperative assessment in the following settings? 14 ⓘ

| Q6 - Have you received training in inpatient preoperative assessment in the following settings? | Count | Count |
|-------------------------------------------------------------------------------------------------|-------|-------|
| Medical school                                                                                  | 7%    | 1     |
| Residency                                                                                       | 64%   | 9     |
| Self-study                                                                                      | 21%   | 3     |
| None                                                                                            | 7%    | 1     |

Have you received training in inpatient preoperative assessment in the following settings? 14 ⓘ

| Q6 - Have you received training in inpatient preoperative assessment in the following settings? | Average (Q6 - Have you received training in inpatient preoperative assessment in the following settings?) | Minimum (Q6 - Have you received training in inpatient preoperative assessment in the following settings?) | Maximum (Q6 - Have you received training in inpatient preoperative assessment in the following settings?) | Count |
|-------------------------------------------------------------------------------------------------|-----------------------------------------------------------------------------------------------------------|-----------------------------------------------------------------------------------------------------------|-----------------------------------------------------------------------------------------------------------|-------|
| Medical school                                                                                  | 2.00                                                                                                      | 2.00                                                                                                      | 2.00                                                                                                      | 1     |
| None                                                                                            | 6.00                                                                                                      | 6.00                                                                                                      | 6.00                                                                                                      | 1     |
| Residency                                                                                       | 4.00                                                                                                      | 4.00                                                                                                      | 4.00                                                                                                      | 9     |
| Self-study                                                                                      | 5.00                                                                                                      | 5.00                                                                                                      | 5.00                                                                                                      | 3     |

How confident are you in performing ambulatory preoperative assessment? 14 ⓘ

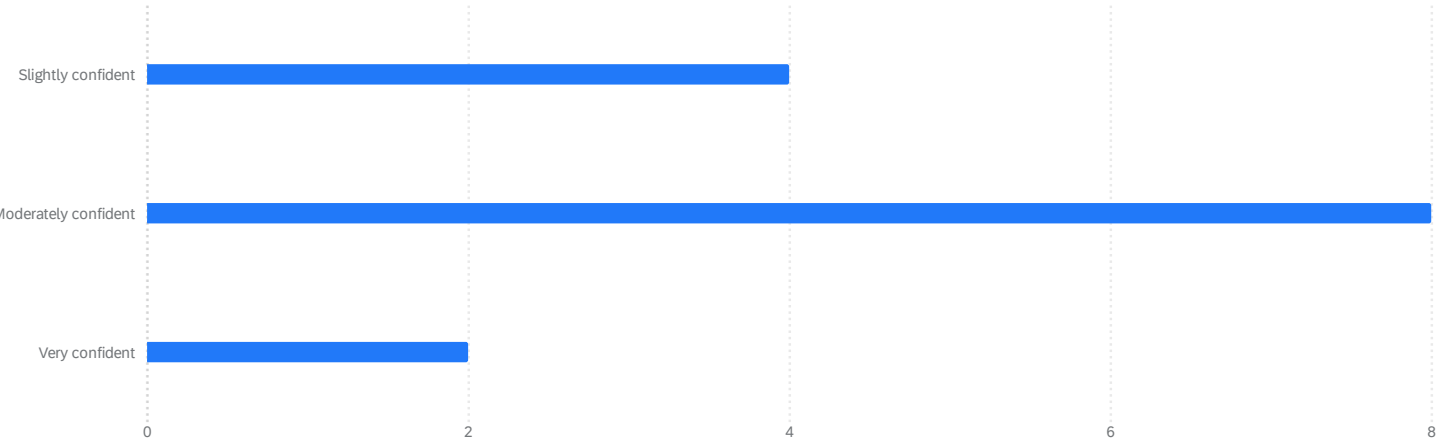

How confident are you in performing ambulatory preoperative assessment? 14 ⓘ

| Q7 - How confident are you in performing ambulatory preoperative assessment? | Count | Count |
|------------------------------------------------------------------------------|-------|-------|
| Slightly confident                                                           | 29%   | 4     |
| Moderately confident                                                         | 57%   | 8     |
| Very confident                                                               | 14%   | 2     |

How confident are you in performing ambulatory preoperative assessment? 14 ⓘ

| Q7 - How confident are you in performing ambulatory preoperative assessment? | Average (Q7 - How confident are you in performing ambulatory preoperative assessment?) | Minimum (Q7 - How confident are you in performing ambulatory preoperative assessment?) | Maximum (Q7 - How confident are you in performing ambulatory preoperative assessment?) | Count |
|------------------------------------------------------------------------------|----------------------------------------------------------------------------------------|----------------------------------------------------------------------------------------|----------------------------------------------------------------------------------------|-------|
| Moderately confident                                                         | 3.00                                                                                   | 3.00                                                                                   | 3.00                                                                                   | 8     |
| Slightly confident                                                           | 2.00                                                                                   | 2.00                                                                                   | 2.00                                                                                   | 4     |
| Very confident                                                               | 4.00                                                                                   | 4.00                                                                                   | 4.00                                                                                   | 2     |

How confident are you in performing inpatient preoperative assessment? 14 ⓘ

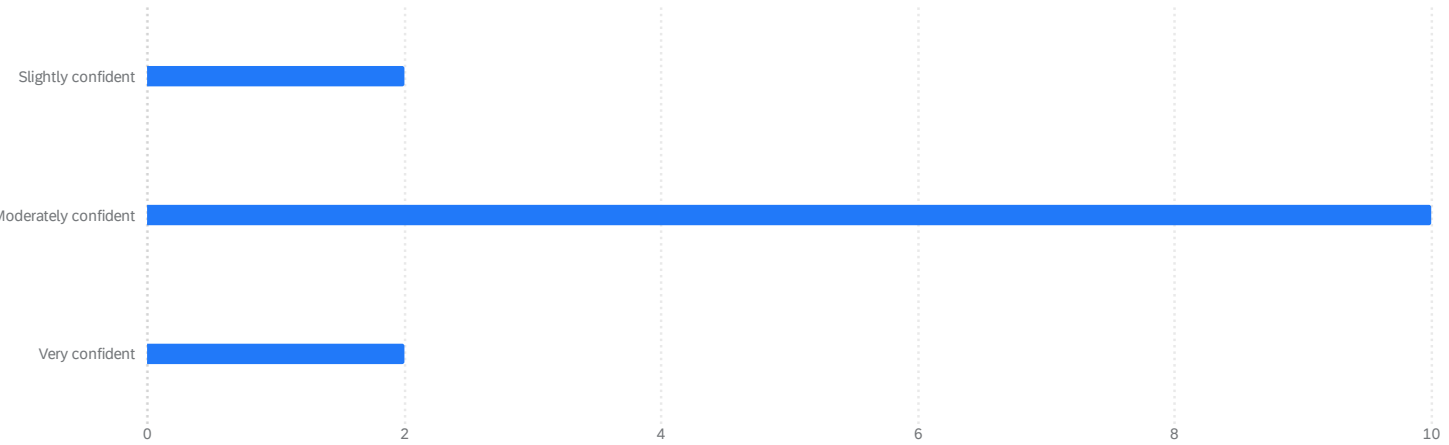

How confident are you in performing inpatient preoperative assessment? 14 ⓘ

| Q8 - How confident are you in performing inpatient preoperative assessment? | Count | Count |
|-----------------------------------------------------------------------------|-------|-------|
| Slightly confident                                                          | 14%   | 2     |
| Moderately confident                                                        | 71%   | 10    |
| Very confident                                                              | 14%   | 2     |

How confident are you in performing inpatient preoperative assessment? 14 ⓘ

| Q8 - How confident are you in performing inpatient preoperative assessment? | Average (Q8 - How confident are you in performing inpatient preoperative assessment?) | Minimum (Q8 - How confident are you in performing inpatient preoperative assessment?) | Maximum (Q8 - How confident are you in performing inpatient preoperative assessment?) | Count |
|-----------------------------------------------------------------------------|---------------------------------------------------------------------------------------|---------------------------------------------------------------------------------------|---------------------------------------------------------------------------------------|-------|
| Moderately confident                                                        | 3.00                                                                                  | 3.00                                                                                  | 3.00                                                                                  | 10    |
| Slightly confident                                                          | 2.00                                                                                  | 2.00                                                                                  | 2.00                                                                                  | 2     |
| Very confident                                                              | 4.00                                                                                  | 4.00                                                                                  | 4.00                                                                                  | 2     |

How confident are you in applying the ACC/AHA guidelines for perioperative cardiovascular evaluation? 14 ⓘ

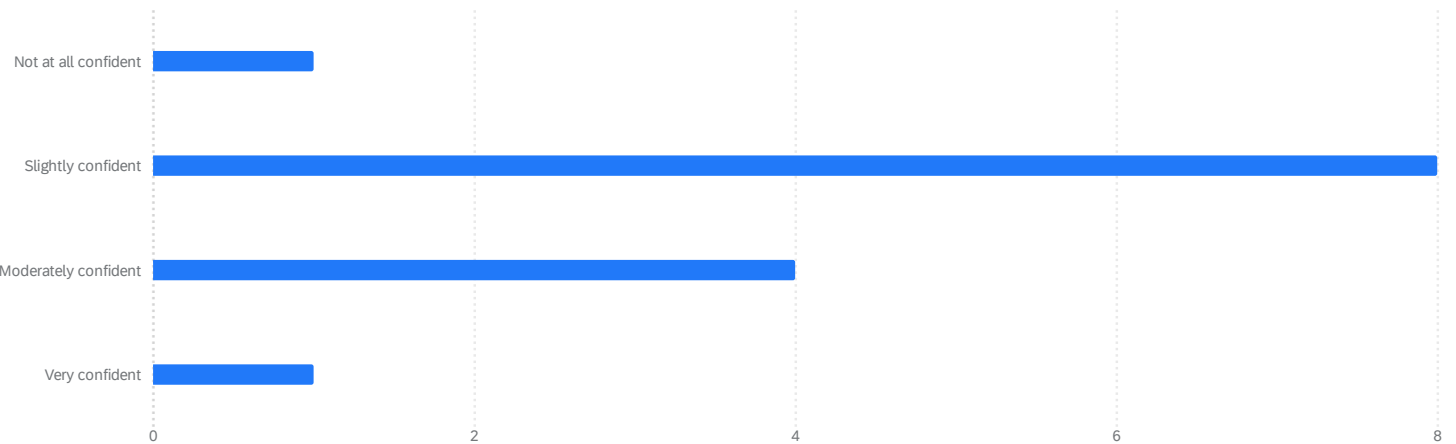

How confident are you in applying the ACC/AHA guidelines for perioperative cardiovascular evaluation? 14 ⓘ

| Q9 - How confident are you in applying the ACC/AHA guidelines for perioperative cardiovascular evaluation? | Count | Count |
|------------------------------------------------------------------------------------------------------------|-------|-------|
| Not at all confident                                                                                       | 7%    | 1     |
| Slightly confident                                                                                         | 57%   | 8     |
| Moderately confident                                                                                       | 29%   | 4     |
| Very confident                                                                                             | 7%    | 1     |

How confident are you in applying the ACC/AHA guidelines for perioperative cardiovascular evaluation? 14 ⓘ

| Q9 - How confident are you in applying the ACC/AHA guidelines for perioperative cardiovascular evaluation? | Average (Q9 - How confident are you in applying the ACC/AHA guidelines for perioperative cardiovascular evaluation?) | Minimum (Q9 - How confident are you in applying the ACC/AHA guidelines for perioperative cardiovascular evaluation?) | Maximum (Q9 - How confident are you in applying the ACC/AHA guidelines for perioperative cardiovascular evaluation?) | Count |
|------------------------------------------------------------------------------------------------------------|----------------------------------------------------------------------------------------------------------------------|----------------------------------------------------------------------------------------------------------------------|----------------------------------------------------------------------------------------------------------------------|-------|
| Moderately confident                                                                                       | 3.00                                                                                                                 | 3.00                                                                                                                 | 3.00                                                                                                                 | 4     |
| Not at all confident                                                                                       | 1.00                                                                                                                 | 1.00                                                                                                                 | 1.00                                                                                                                 | 1     |
| Slightly confident                                                                                         | 2.00                                                                                                                 | 2.00                                                                                                                 | 2.00                                                                                                                 | 8     |
| Very confident                                                                                             | 4.00                                                                                                                 | 4.00                                                                                                                 | 4.00                                                                                                                 | 1     |



How confident are you in managing patients undergoing bariatric surgery preoperatively? 14 ⓘ

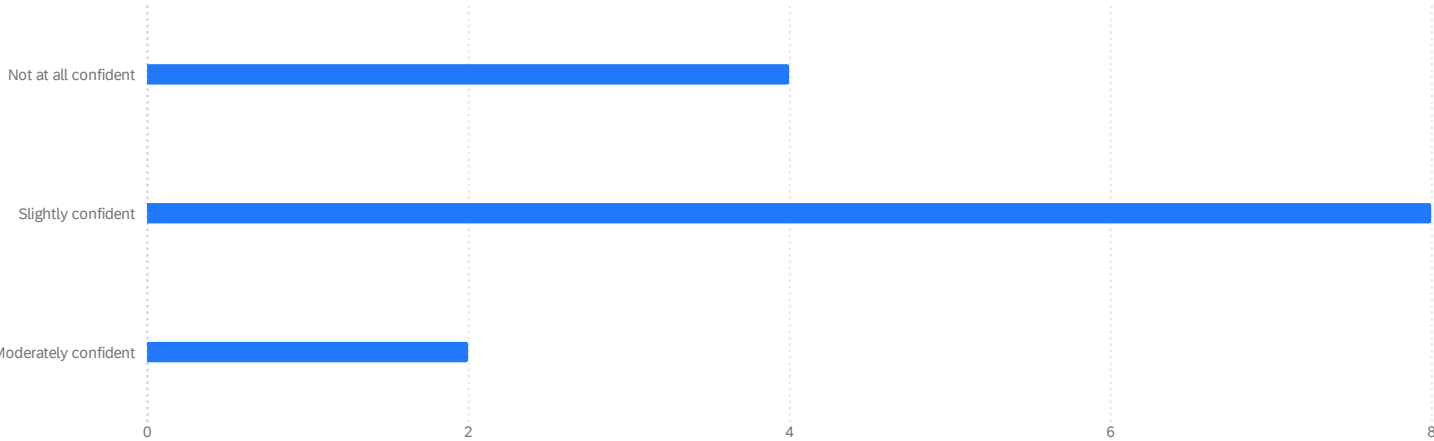

How confident are you in managing patients undergoing bariatric surgery preoperatively? 14 ⓘ

| Q10 - How confident are you in managing patients undergoing bariatric surgery preoperatively? | Count | Count |
|-----------------------------------------------------------------------------------------------|-------|-------|
| Not at all confident                                                                          | 29%   | 4     |
| Slightly confident                                                                            | 57%   | 8     |
| Moderately confident                                                                          | 14%   | 2     |

How confident are you in managing patients undergoing bariatric surgery preoperatively? 14 ⓘ

| Q10 - How confident are you in managing patients undergoing bariatric surgery preoperatively? | Average (Q10 - How confident are you in managing patients undergoing bariatric surgery preoperatively?) | Minimum (Q10 - How confident are you in managing patients undergoing bariatric surgery preoperatively?) | Maximum (Q10 - How confident are you in managing patients undergoing bariatric surgery preoperatively?) | Count |
|-----------------------------------------------------------------------------------------------|---------------------------------------------------------------------------------------------------------|---------------------------------------------------------------------------------------------------------|---------------------------------------------------------------------------------------------------------|-------|
| Moderately confident                                                                          | 3.00                                                                                                    | 3.00                                                                                                    | 3.00                                                                                                    | 2     |
| Not at all confident                                                                          | 1.00                                                                                                    | 1.00                                                                                                    | 1.00                                                                                                    | 4     |
| Slightly confident                                                                            | 2.00                                                                                                    | 2.00                                                                                                    | 2.00                                                                                                    | 8     |

How confident are you in managing patients with chronic kidney disease preoperatively? 14 ⓘ

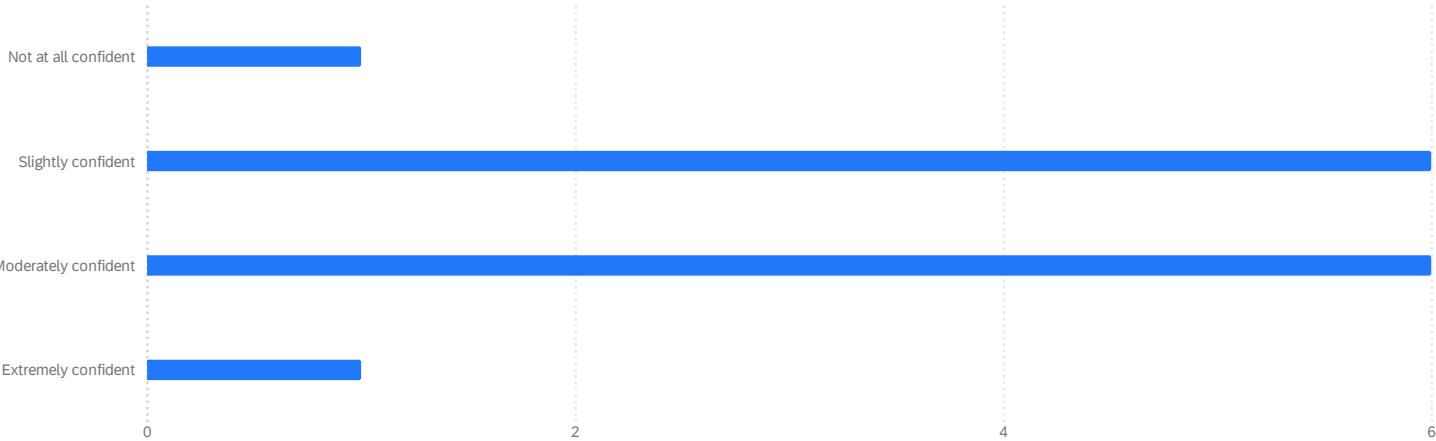

How confident are you in managing patients with chronic kidney disease preoperatively? 14 ⓘ

| Q11 - How confident are you in managing patients with chronic kidney disease preoperatively? | Count | Count |
|----------------------------------------------------------------------------------------------|-------|-------|
| Not at all confident                                                                         | 7%    | 1     |
| Slightly confident                                                                           | 43%   | 6     |
| Moderately confident                                                                         | 43%   | 6     |
| Extremely confident                                                                          | 7%    | 1     |

How confident are you in managing patients with chronic kidney disease preoperatively? 14 ⓘ

| Q11 - How confident are you in managing patients with chronic kidney disease preoperatively? | Average (Q11 - How confident are you in managing patients with chronic kidney disease preoperatively?) | Minimum (Q11 - How confident are you in managing patients with chronic kidney disease preoperatively?) | Maximum (Q11 - How confident are you in managing patients with chronic kidney disease preoperatively?) | Count |
|----------------------------------------------------------------------------------------------|--------------------------------------------------------------------------------------------------------|--------------------------------------------------------------------------------------------------------|--------------------------------------------------------------------------------------------------------|-------|
| Extremely confident                                                                          | 5.00                                                                                                   | 5.00                                                                                                   | 5.00                                                                                                   | 1     |
| Moderately confident                                                                         | 3.00                                                                                                   | 3.00                                                                                                   | 3.00                                                                                                   | 6     |
| Not at all confident                                                                         | 1.00                                                                                                   | 1.00                                                                                                   | 1.00                                                                                                   | 1     |
| Slightly confident                                                                           | 2.00                                                                                                   | 2.00                                                                                                   | 2.00                                                                                                   | 6     |

How confident are you in managing patients with liver disease preoperatively? 14 ⓘ

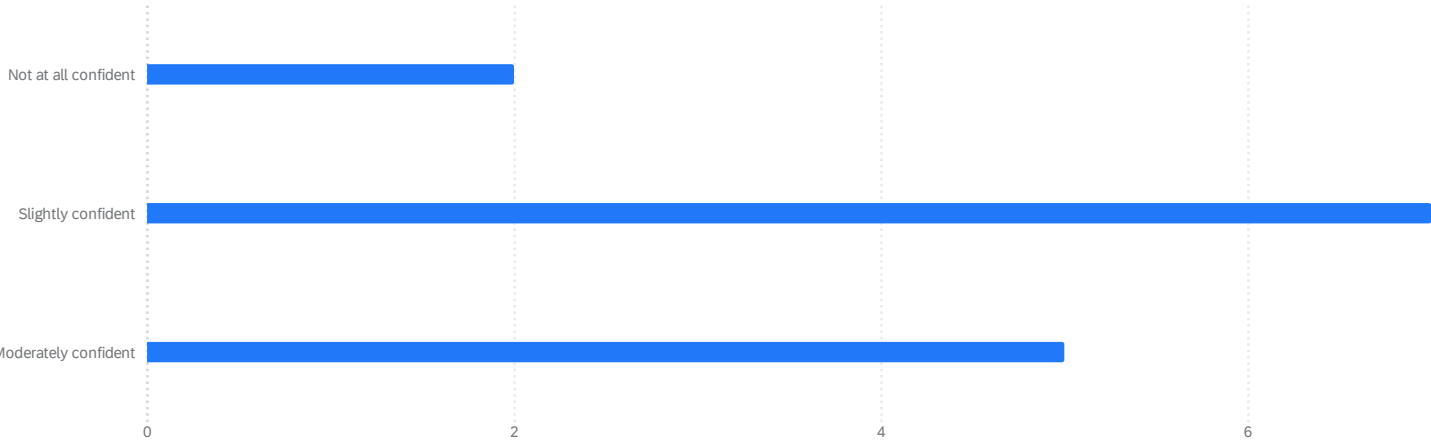

How confident are you in managing patients with liver disease preoperatively? 14 ⓘ

| Q12 - How confident are you in managing patients with liver disease preoperatively? | Count | Count |
|-------------------------------------------------------------------------------------|-------|-------|
| Not at all confident                                                                | 14%   | 2     |
| Slightly confident                                                                  | 50%   | 7     |
| Moderately confident                                                                | 36%   | 5     |

How confident are you in managing patients with liver disease preoperatively? 14 ⓘ

| Q12 - How confident are you in managing patients with liver disease preoperatively? | Average (Q12 - How confident are you in managing patients with liver disease preoperatively?) | Minimum (Q12 - How confident are you in managing patients with liver disease preoperatively?) | Maximum (Q12 - How confident are you in managing patients with liver disease preoperatively?) | Count |
|-------------------------------------------------------------------------------------|-----------------------------------------------------------------------------------------------|-----------------------------------------------------------------------------------------------|-----------------------------------------------------------------------------------------------|-------|
| Moderately confident                                                                | 3.00                                                                                          | 3.00                                                                                          | 3.00                                                                                          | 5     |
| Not at all confident                                                                | 1.00                                                                                          | 1.00                                                                                          | 1.00                                                                                          | 2     |
| Slightly confident                                                                  | 2.00                                                                                          | 2.00                                                                                          | 2.00                                                                                          | 7     |

How confident are you in managing patients with rheumatologic conditions (e.g., RA) preoperatively? 14 ⓘ

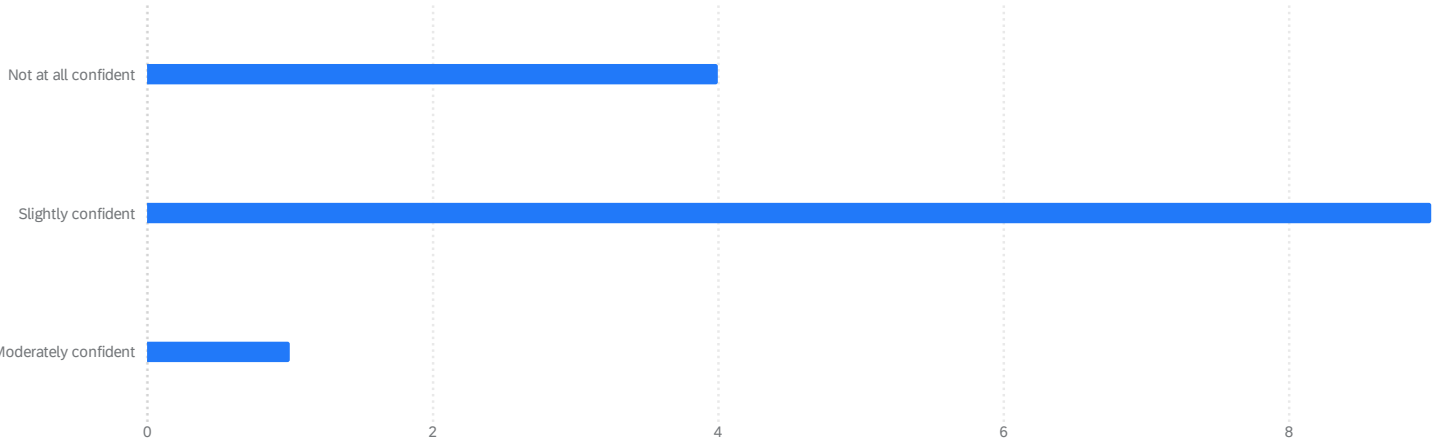

How confident are you in managing patients with rheumatologic conditions (e.g., RA) preoperatively? 14 ⓘ

| Q13 - How confident are you in managing patients with rheumatologic conditions (e.g., RA) preoperatively? | Count | Count |
|-----------------------------------------------------------------------------------------------------------|-------|-------|
| Not at all confident                                                                                      | 29%   | 4     |
| Slightly confident                                                                                        | 64%   | 9     |
| Moderately confident                                                                                      | 7%    | 1     |

How confident are you in managing patients with rheumatologic conditions (e.g., RA) preoperatively? 14 ⓘ

| Q13 - How confident are you in managing patients with rheumatologic conditions (e.g., RA) preoperatively? | Average (Q13 - How confident are you in managing patients with rheumatologic conditions (e.g., RA) preoperatively?) | Minimum (Q13 - How confident are you in managing patients with rheumatologic conditions (e.g., RA) preoperatively?) | Maximum (Q13 - How confident are you in managing patients with rheumatologic conditions (e.g., RA) preoperatively?) | Count |
|-----------------------------------------------------------------------------------------------------------|---------------------------------------------------------------------------------------------------------------------|---------------------------------------------------------------------------------------------------------------------|---------------------------------------------------------------------------------------------------------------------|-------|
| Moderately confident                                                                                      | 3.00                                                                                                                | 3.00                                                                                                                | 3.00                                                                                                                | 1     |
| Not at all confident                                                                                      | 1.00                                                                                                                | 1.00                                                                                                                | 1.00                                                                                                                | 4     |
| Slightly confident                                                                                        | 2.00                                                                                                                | 2.00                                                                                                                | 2.00                                                                                                                | 9     |

Guidelines recommend utilizing risk calculators to estimate risk of major adverse cardiac events (MACE). What is the percentage cut off? 10 ⓘ

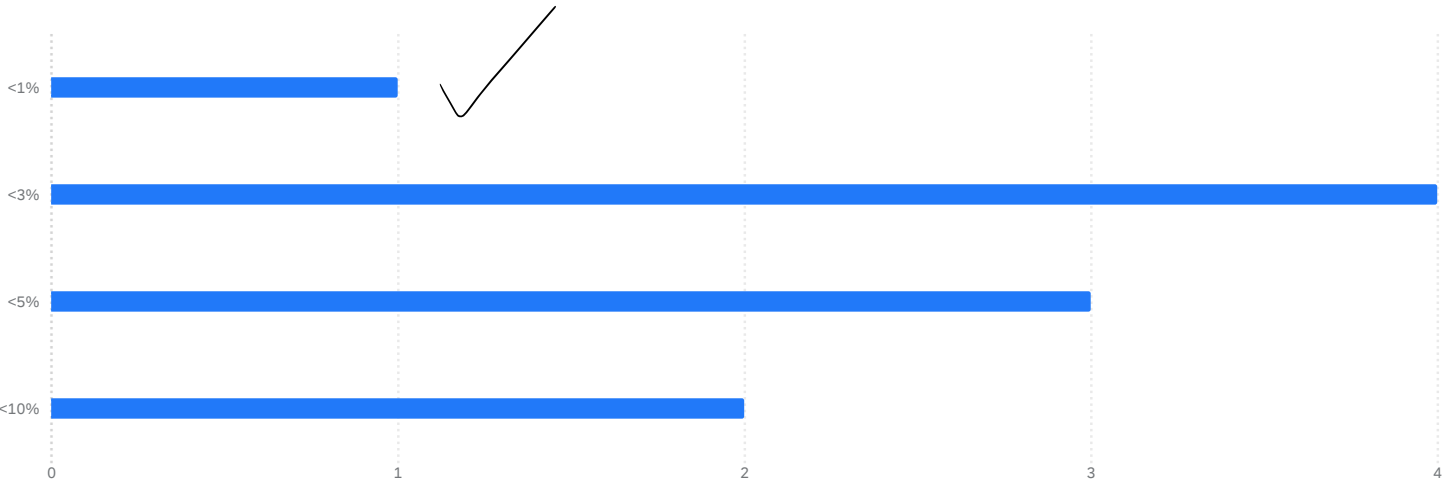

Guidelines recommend utilizing risk calculators to estimate risk of major adverse cardiac events (MACE). What is the percentage cut off? 10 ⓘ

| Q14 - Guidelines recommend utilizing risk calculators to estimate risk of major adverse cardiac events (MACE). What is the percentage cut off? | Count | Count |
|------------------------------------------------------------------------------------------------------------------------------------------------|-------|-------|
| <1%                                                                                                                                            | 10%   | 1     |
| <3%                                                                                                                                            | 40%   | 4     |
| <5%                                                                                                                                            | 30%   | 3     |
| <10%                                                                                                                                           | 20%   | 2     |

Guidelines recommend utilizing risk calculators to estimate risk of major adverse cardiac events (MACE). What is the percentage cut off? 10 ⓘ

| Q14 - Guidelines recommend utilizing risk calculators to estimate risk of major adverse cardiac events (MACE). What is the percentage cut off? | Average (Q14 - Guidelines recommend utilizing risk calculators to estimate risk of major adverse cardiac events (MACE). What is the percentage cut off?) | Minimum (Q14 - Guidelines recommend utilizing risk calculators to estimate risk of major adverse cardiac events (MACE). What is the percentage cut off?) | Maximum (Q14 - Guidelines recommend utilizing risk calculators to estimate risk of major adverse cardiac events (MACE). What is the percentage cut off?) | Count |
|------------------------------------------------------------------------------------------------------------------------------------------------|----------------------------------------------------------------------------------------------------------------------------------------------------------|----------------------------------------------------------------------------------------------------------------------------------------------------------|----------------------------------------------------------------------------------------------------------------------------------------------------------|-------|
| <1%                                                                                                                                            | 1.00                                                                                                                                                     | 1.00                                                                                                                                                     | 1.00                                                                                                                                                     | 1     |
| <10%                                                                                                                                           | 4.00                                                                                                                                                     | 4.00                                                                                                                                                     | 4.00                                                                                                                                                     | 2     |
| <3%                                                                                                                                            | 2.00                                                                                                                                                     | 2.00                                                                                                                                                     | 2.00                                                                                                                                                     | 4     |
| <5%                                                                                                                                            | 3.00                                                                                                                                                     | 3.00                                                                                                                                                     | 3.00                                                                                                                                                     | 3     |

For patients who received bare metal stents, which of the following is a TRUE statement? 10 ⓘ

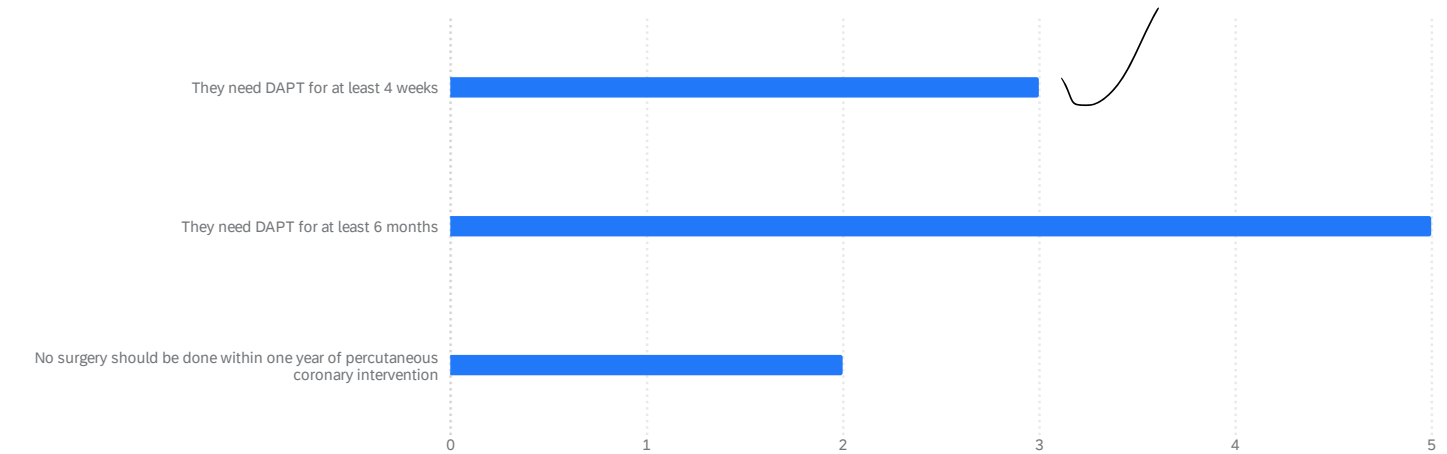

For patients who received bare metal stents, which of the following is a TRUE statement? 10 ⓘ

| Q15 - For patients who received bare metal stents, which of the following is a TRUE statement? | Count | Count |
|------------------------------------------------------------------------------------------------|-------|-------|
| They need DAPT for at least 4 weeks                                                            | 30%   | 3     |
| They need DAPT for at least 6 months                                                           | 50%   | 5     |
| No surgery should be done within one year of percutaneous coronary intervention                | 20%   | 2     |

For patients who received bare metal stents, which of the following is a TRUE statement? 10 ⓘ

| Q15 - For patients who received bare metal stents, which of the following is a TRUE statement? | Average (Q15 - For patients who received bare metal stents, which of the following is a TRUE statement?) | Minimum (Q15 - For patients who received bare metal stents, which of the following is a TRUE statement?) | Maximum (Q15 - For patients who received bare metal stents, which of the following is a TRUE statement?) | Count |
|------------------------------------------------------------------------------------------------|----------------------------------------------------------------------------------------------------------|----------------------------------------------------------------------------------------------------------|----------------------------------------------------------------------------------------------------------|-------|
| No surgery should be done within one year of percutaneous coronary intervention                | 3.00                                                                                                     | 3.00                                                                                                     | 3.00                                                                                                     | 2     |
| They need DAPT for at least 4 weeks                                                            | 1.00                                                                                                     | 1.00                                                                                                     | 1.00                                                                                                     | 3     |
| They need DAPT for at least 6 months                                                           | 2.00                                                                                                     | 2.00                                                                                                     | 2.00                                                                                                     | 5     |

For patients who received drug-eluting stents, what is the recommended duration for dual anti-platelet therapy? 10 ⓘ

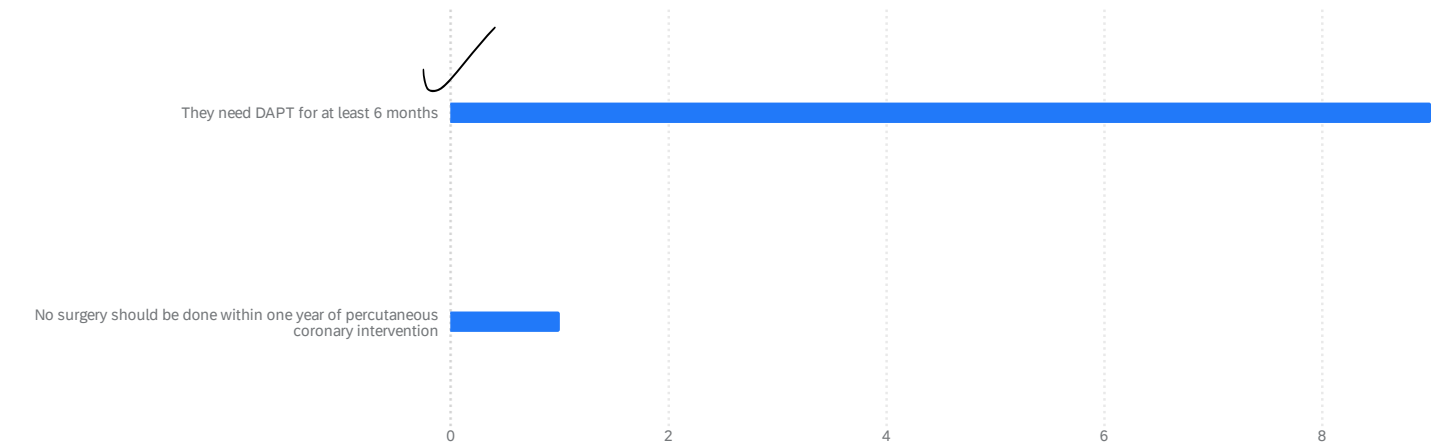

For patients who received drug-eluting stents, what is the recommended duration for dual anti-platelet therapy? 10 ⓘ

| Q16 - For patients who received drug-eluting stents, what is the recommended duration for dual anti-platelet therapy? | Count | Count |
|-----------------------------------------------------------------------------------------------------------------------|-------|-------|
| They need DAPT for at least 6 months                                                                                  | 90%   | 9     |
| No surgery should be done within one year of percutaneous coronary intervention                                       | 10%   | 1     |

For patients who received drug-eluting stents, what is the recommended duration for dual anti-platelet therapy? 10 ⓘ

| Q16 - For patients who received drug-eluting stents, what is the recommended duration for dual anti-platelet therapy? | Average (Q16 - For patients who received drug-eluting stents, what is the recommended duration for dual anti-platelet therapy?) | Minimum (Q16 - For patients who received drug-eluting stents, what is the recommended duration for dual anti-platelet therapy?) | Maximum (Q16 - For patients who received drug-eluting stents, what is the recommended duration for dual anti-platelet therapy?) | Count |
|-----------------------------------------------------------------------------------------------------------------------|---------------------------------------------------------------------------------------------------------------------------------|---------------------------------------------------------------------------------------------------------------------------------|---------------------------------------------------------------------------------------------------------------------------------|-------|
| No surgery should be done within one year of percutaneous coronary intervention                                       | 3.00                                                                                                                            | 3.00                                                                                                                            | 3.00                                                                                                                            | 1     |
| They need DAPT for at least 6 months                                                                                  | 2.00                                                                                                                            | 2.00                                                                                                                            | 2.00                                                                                                                            | 9     |

Which statement is true? 10 ⓘ

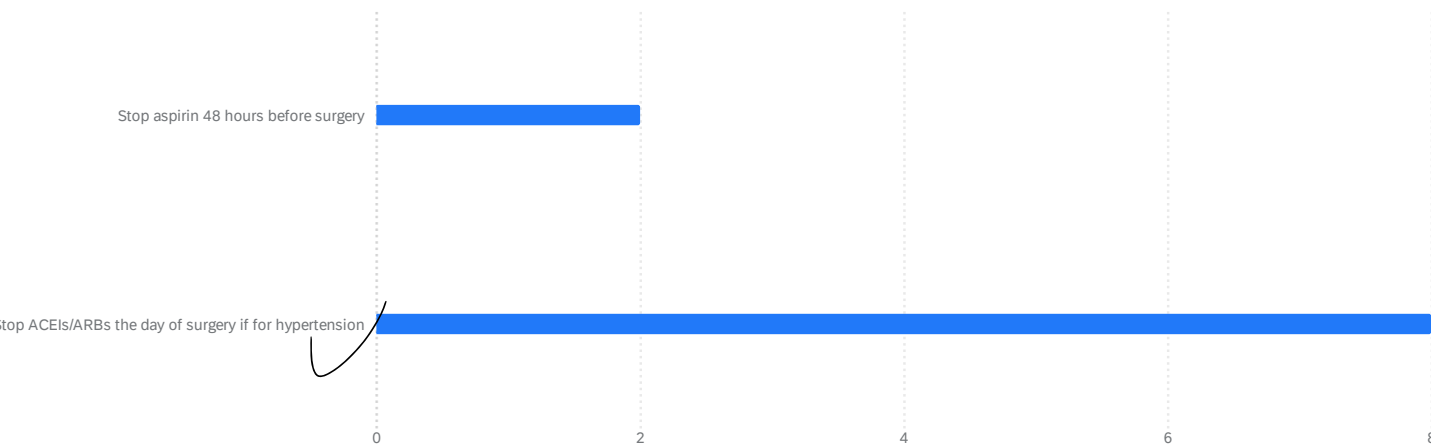

Which statement is true? 10 ⓘ

| Q17 - Which statement is true?                         | Count | Count |
|--------------------------------------------------------|-------|-------|
| Stop aspirin 48 hours before surgery                   | 20%   | 2     |
| Stop ACEIs/ARBs the day of surgery if for hypertension | 80%   | 8     |

Which statement is true? 10 ⓘ

| Q17 - Which statement is true?                         | Average (Q17 - Which statement is true?) | Minimum (Q17 - Which statement is true?) | Maximum (Q17 - Which statement is true?) | Count |
|--------------------------------------------------------|------------------------------------------|------------------------------------------|------------------------------------------|-------|
| Stop ACEIs/ARBs the day of surgery if for hypertension | 3.00                                     | 3.00                                     | 3.00                                     | 8     |
| Stop aspirin 48 hours before surgery                   | 1.00                                     | 1.00                                     | 1.00                                     | 2     |

Which set of patients require stress dose steroids to prevent adrenal crisis during surgery? 10 ⓘ

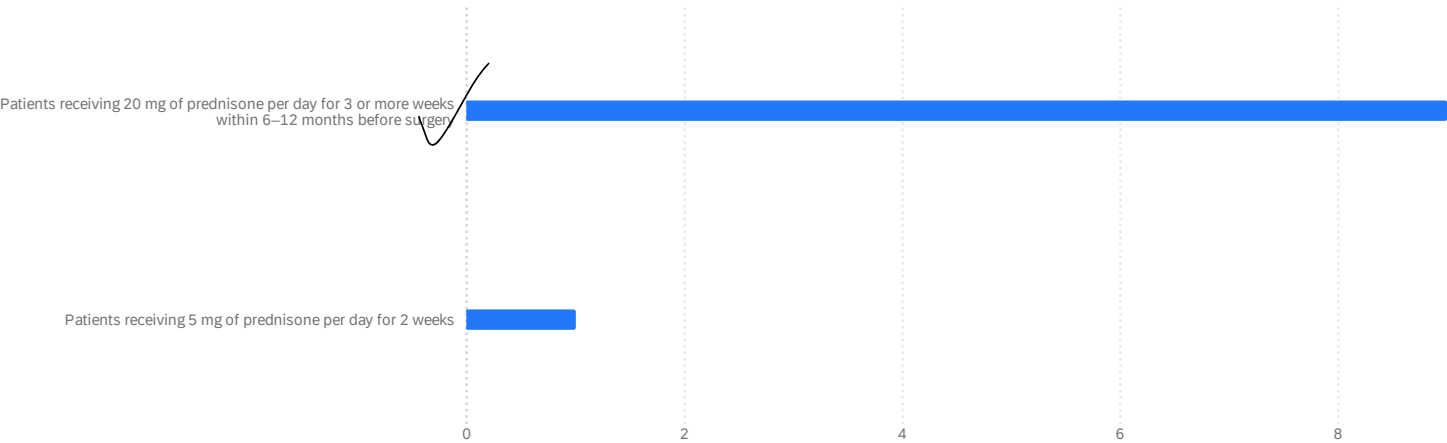

Which set of patients require stress dose steroids to prevent adrenal crisis during surgery? 10 ⓘ

| Q18 - Which set of patients require stress dose steroids to prevent adrenal crisis during surgery?   | Count | Count |
|------------------------------------------------------------------------------------------------------|-------|-------|
| Patients receiving 20 mg of prednisone per day for 3 or more weeks within 6–12 months before surgery | 90%   | 9     |
| Patients receiving 5 mg of prednisone per day for 2 weeks                                            | 10%   | 1     |

Which set of patients require stress dose steroids to prevent adrenal crisis during surgery? 10 ⓘ

| Q18 - Which set of patients require stress dose steroids to prevent adrenal crisis during surgery?   | Average (Q18 - Which set of patients require stress dose steroids to prevent adrenal crisis during surgery?) | Minimum (Q18 - Which set of patients require stress dose steroids to prevent adrenal crisis during surgery?) | Maximum (Q18 - Which set of patients require stress dose steroids to prevent adrenal crisis during surgery?) | Count |
|------------------------------------------------------------------------------------------------------|--------------------------------------------------------------------------------------------------------------|--------------------------------------------------------------------------------------------------------------|--------------------------------------------------------------------------------------------------------------|-------|
| Patients receiving 20 mg of prednisone per day for 3 or more weeks within 6–12 months before surgery | 2.00                                                                                                         | 2.00                                                                                                         | 2.00                                                                                                         | 9     |



| Q18 - Which set of patients require stress dose steroids to prevent adrenal crisis during surgery? | Average (Q18 - Which set of patients require stress dose steroids to prevent adrenal crisis during surgery?) | Minimum (Q18 - Which set of patients require stress dose steroids to prevent adrenal crisis during surgery?) | Maximum (Q18 - Which set of patients require stress dose steroids to prevent adrenal crisis during surgery?) | Count |
|----------------------------------------------------------------------------------------------------|--------------------------------------------------------------------------------------------------------------|--------------------------------------------------------------------------------------------------------------|--------------------------------------------------------------------------------------------------------------|-------|
| Patients receiving 5 mg of prednisone per day for 2 weeks                                          | 3.00                                                                                                         | 3.00                                                                                                         | 3.00                                                                                                         | 1     |

Which of the following statements are true regarding insulin management prior to surgery for patients with type I diabetes? (Select all that apply) 10 ⓘ

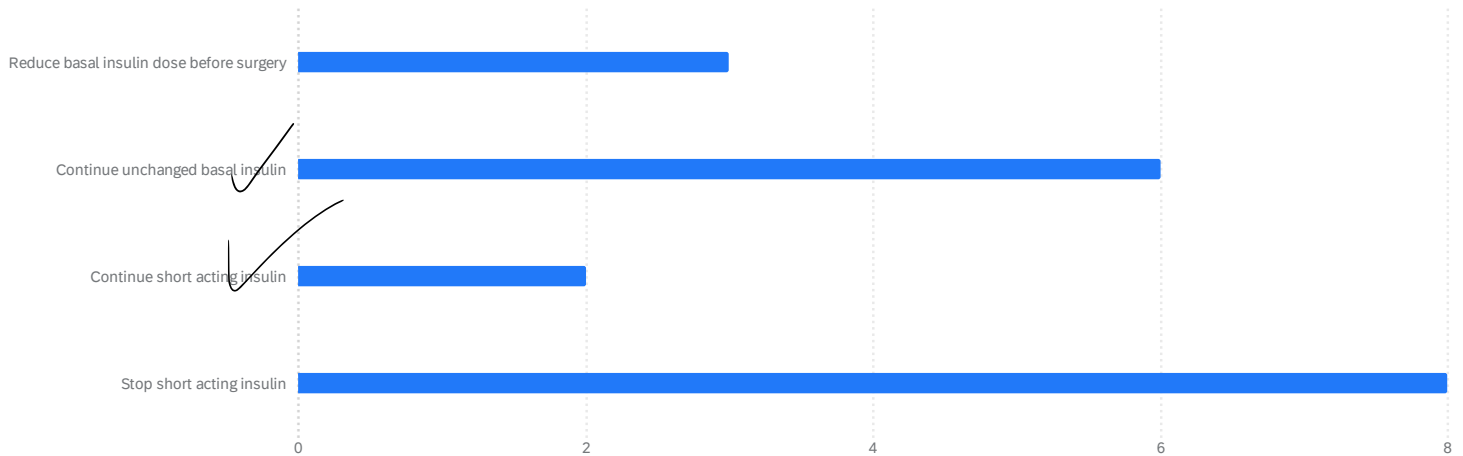

Which of the following statements are true regarding insulin management prior to surgery for patients with type I diabetes? (Select all that apply) 10 ⓘ

| Q19 - Which of the following statements are true regarding insulin management prior to surgery for patients with type I diabetes? (Select all that apply) | Count | Count |
|-----------------------------------------------------------------------------------------------------------------------------------------------------------|-------|-------|
| Reduce basal insulin dose before surgery                                                                                                                  | 30%   | 3     |
| Continue unchanged basal insulin                                                                                                                          | 60%   | 6     |
| Continue short acting insulin                                                                                                                             | 20%   | 2     |
| Stop short acting insulin                                                                                                                                 | 80%   | 8     |

Which statement regarding SGLT2 inhibitors is true? (Select all that apply) 10 ⓘ

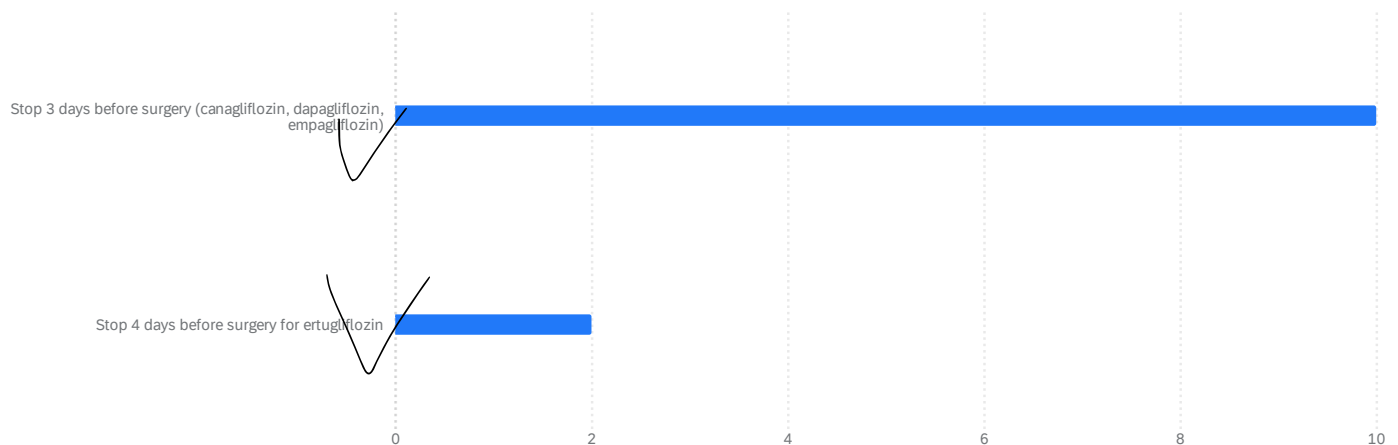

Which statement regarding SGLT2 inhibitors is true? (Select all that apply) 10 ⓘ

| Q20 - Which statement regarding SGLT2 inhibitors is true? (Select all that apply) | Count | Count |
|-----------------------------------------------------------------------------------|-------|-------|
| Stop 3 days before surgery (canagliflozin, dapagliflozin, empagliflozin)          | 100%  | 10    |
| Stop 4 days before surgery for ertugliflozin                                      | 20%   | 2     |

Which rheumatologic agents are safe to continue before surgery? (Select all that apply) 10 ⓘ

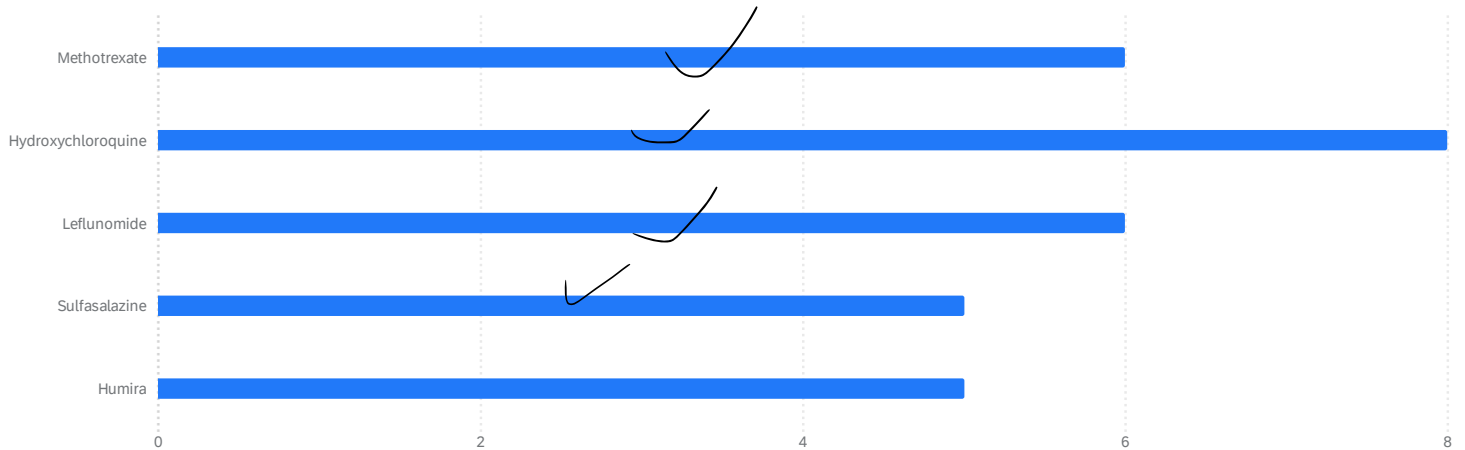

Which rheumatologic agents are safe to continue before surgery? (Select all that apply) 10 ⓘ

| Q21 - Which rheumatologic agents are safe to continue before surgery? (Select all that apply) | Count | Count |
|-----------------------------------------------------------------------------------------------|-------|-------|
| Methotrexate                                                                                  | 60%   | 6     |
| Hydroxychloroquine                                                                            | 80%   | 8     |
| Leflunomide                                                                                   | 60%   | 6     |
| Sulfasalazine                                                                                 | 50%   | 5     |
| Humira                                                                                        | 50%   | 5     |

Which statement regarding bridging is true? (Select all that apply) 10 ⓘ

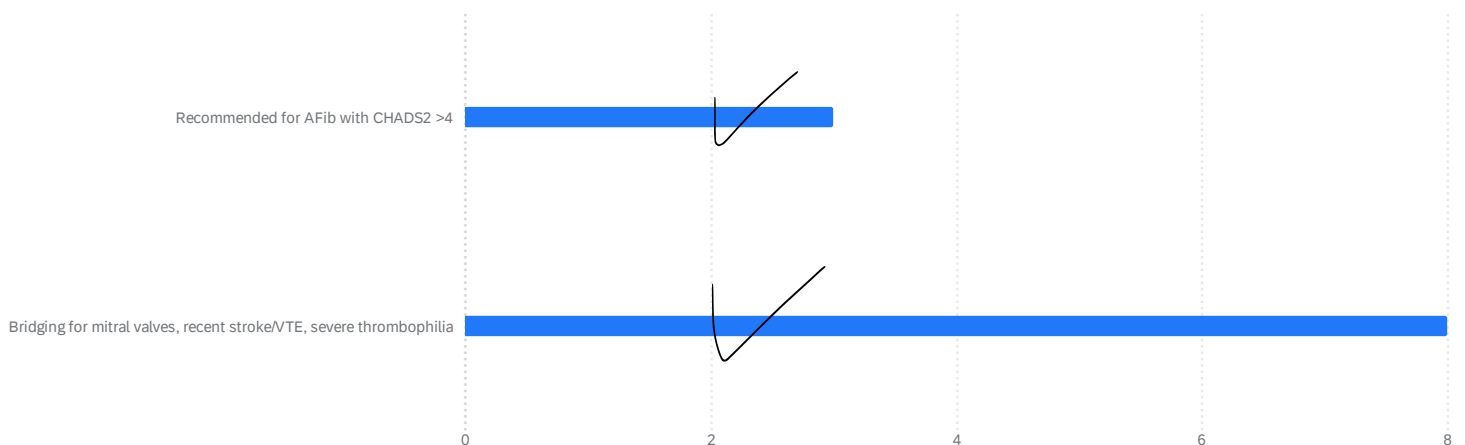

Which statement regarding bridging is true? (Select all that apply) 10 ⓘ

| Q22 - Which statement regarding bridging is true? (Select all that apply) | Count | Count |
|---------------------------------------------------------------------------|-------|-------|
| Recommended for AFib with CHADS2 >4                                       | 30%   | 3     |
| Bridging for mitral valves, recent stroke/VTE, severe thrombophilia       | 80%   | 8     |

For patients on warfarin, you would check INR 7–10 days before the procedure. Which of the following is TRUE? (Select all that apply) 10 ⓘ

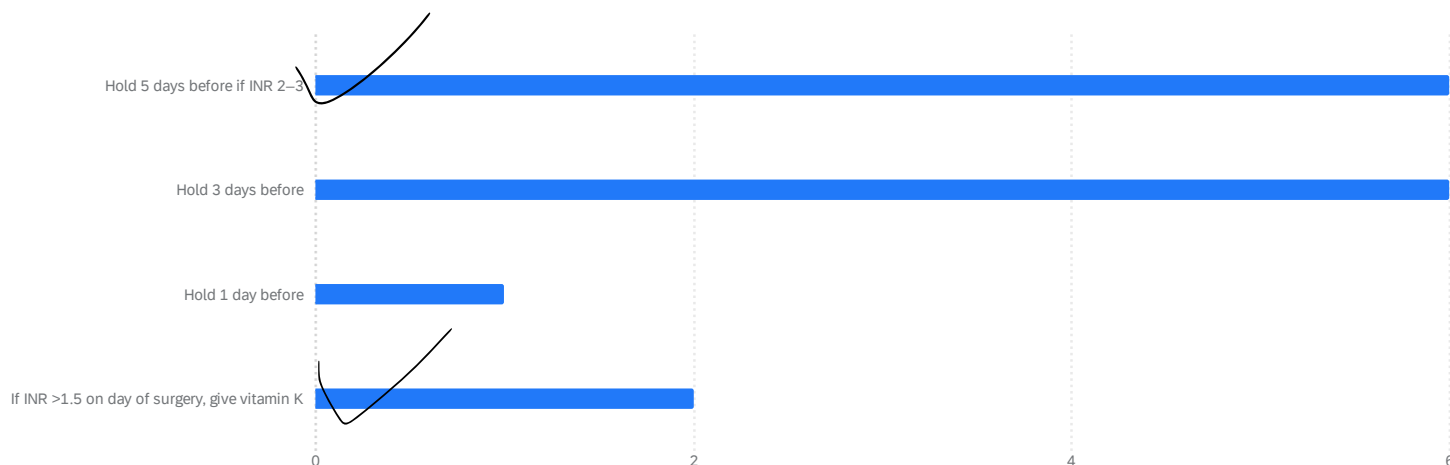

For patients on warfarin, you would check INR 7–10 days before the procedure. Which of the following is TRUE? (Select all that apply) 10 ⓘ

| Q23 - For patients on warfarin, you would check INR 7–10 days before the procedure. Which of the following is TRUE? (Select all that apply) | Count | Count |
|---------------------------------------------------------------------------------------------------------------------------------------------|-------|-------|
| Hold 5 days before if INR 2–3                                                                                                               | 60%   | 6     |
| Hold 3 days before                                                                                                                          | 60%   | 6     |
| Hold 1 day before                                                                                                                           | 10%   | 1     |
| If INR >1.5 on day of surgery, give vitamin K                                                                                               | 20%   | 2     |

How do you restart warfarin after low-moderate bleeding risk procedure? 10 ⓘ

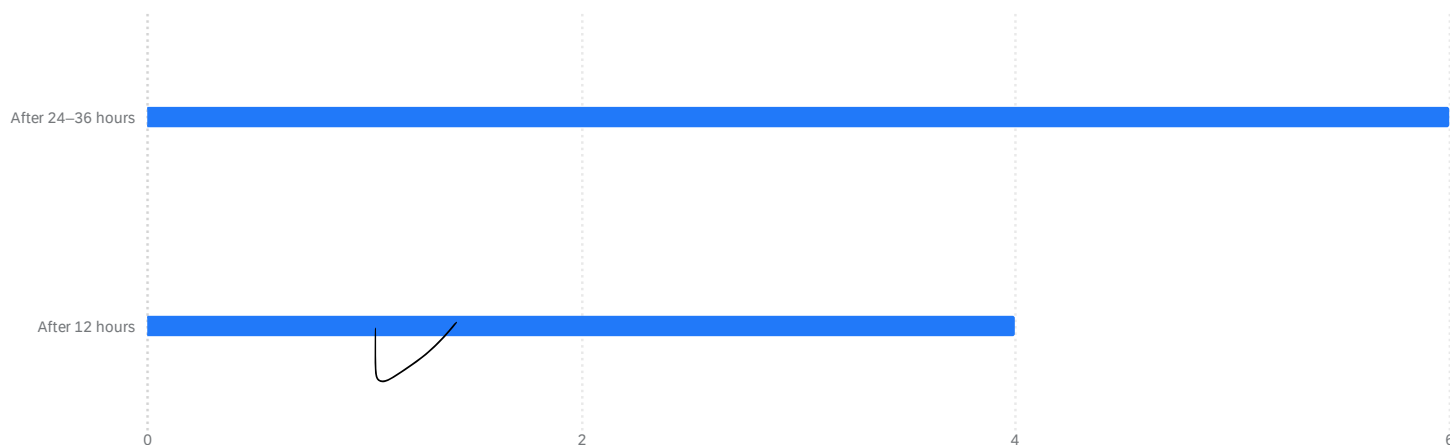

How do you restart warfarin after low-moderate bleeding risk procedure? 10 ⓘ

| Q24 - How do you restart warfarin after low-moderate bleeding risk procedure? | Count | Count |
|-------------------------------------------------------------------------------|-------|-------|
| After 24–36 hours                                                             | 60%   | 6     |
| After 12 hours                                                                | 40%   | 4     |

How do you restart warfarin after low-moderate bleeding risk procedure? 10 ⓘ

| Q24 - How do you restart warfarin after low-moderate bleeding risk procedure? | Average (Q24 - How do you restart warfarin after low-moderate bleeding risk procedure?) | Minimum (Q24 - How do you restart warfarin after low-moderate bleeding risk procedure?) | Maximum (Q24 - How do you restart warfarin after low-moderate bleeding risk procedure?) | Count |
|-------------------------------------------------------------------------------|-----------------------------------------------------------------------------------------|-----------------------------------------------------------------------------------------|-----------------------------------------------------------------------------------------|-------|
| After 12 hours                                                                | 2.00                                                                                    | 2.00                                                                                    | 2.00                                                                                    | 4     |
| After 24–36 hours                                                             | 1.00                                                                                    | 1.00                                                                                    | 1.00                                                                                    | 6     |

Which is true regarding DOACs and normal CrCl? 10 ⓘ

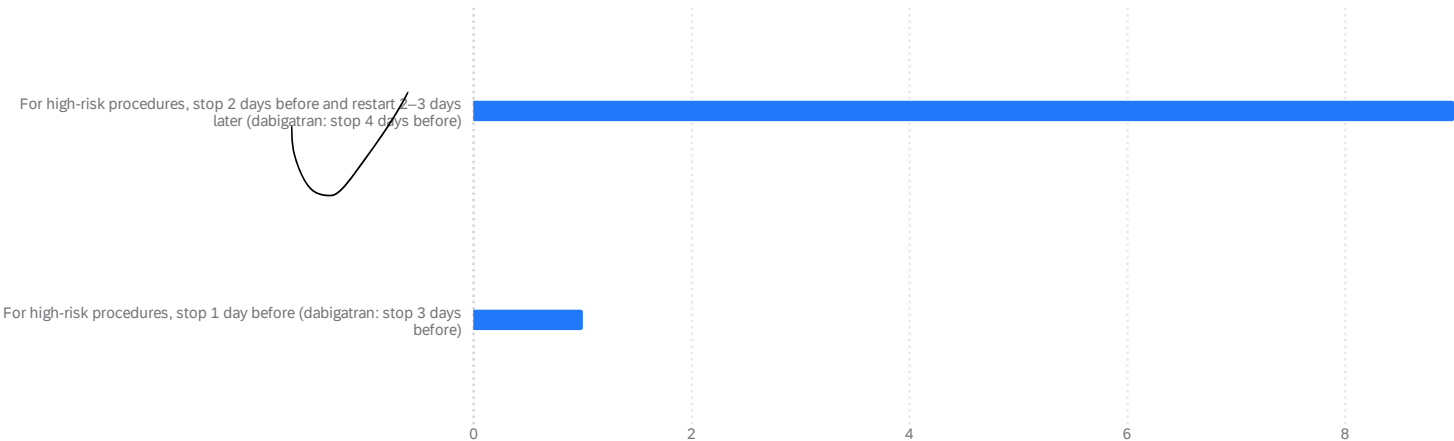

Which is true regarding DOACs and normal CrCl? 10 ⓘ

| Q25 - Which is true regarding DOACs and normal CrCl?                                                     | Count | Count |
|----------------------------------------------------------------------------------------------------------|-------|-------|
| For high-risk procedures, stop 2 days before and restart 2–3 days later (dabigatran: stop 4 days before) | 90%   | 9     |
| For high-risk procedures, stop 1 day before (dabigatran: stop 3 days before)                             | 10%   | 1     |

Which is true regarding DOACs and normal CrCl? 10 ⓘ

| Q25 - Which is true regarding DOACs and normal CrCl?                                                     | Average (Q25 - Which is true regarding DOACs and normal CrCl?) | Minimum (Q25 - Which is true regarding DOACs and normal CrCl?) | Maximum (Q25 - Which is true regarding DOACs and normal CrCl?) | Count |
|----------------------------------------------------------------------------------------------------------|----------------------------------------------------------------|----------------------------------------------------------------|----------------------------------------------------------------|-------|
| For high-risk procedures, stop 1 day before (dabigatran: stop 3 days before)                             | 2.00                                                           | 2.00                                                           | 2.00                                                           | 1     |
| For high-risk procedures, stop 2 days before and restart 2–3 days later (dabigatran: stop 4 days before) | 1.00                                                           | 1.00                                                           | 1.00                                                           | 9     |

What calculator(s) can be used to assess VTE risk in bariatric surgery patients? (Select all that apply) 9 ⓘ

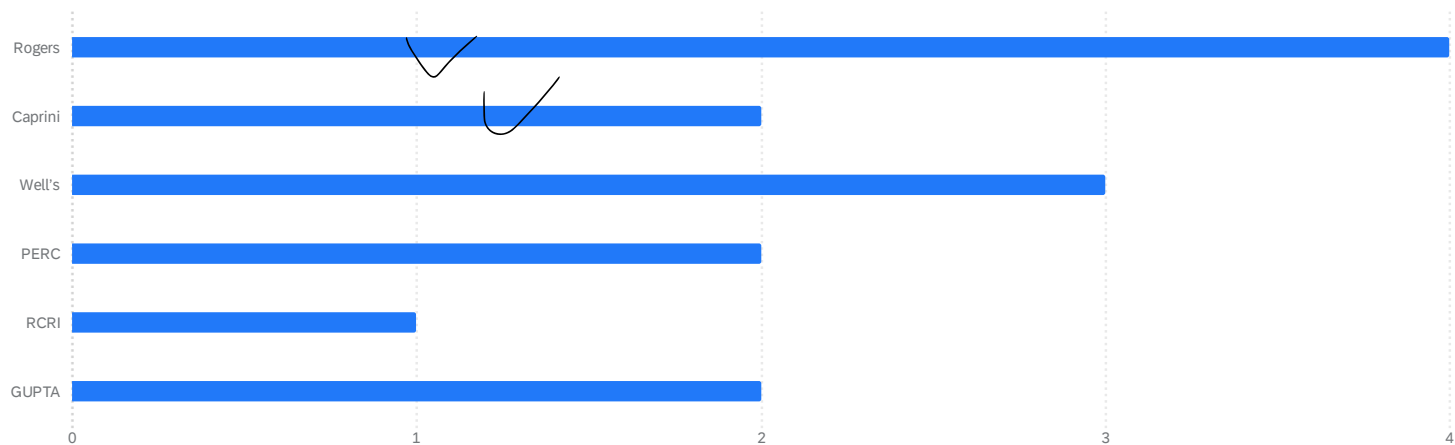

What calculator(s) can be used to assess VTE risk in bariatric surgery patients? (Select all that apply) 9 ⓘ

Q26 - What calculator(s) can be used to assess VTE risk in bariatric surgery patients?  
(Select all that apply)

Count

Count

Rogers

44%

4

Caprini

22%

2

Well's

33%

3

PERC

22%

2

RCRI

11%

1

GUPTA

22%

2

Please provide feedback for improvement: 14 ⓘ

Please provide feedback for improvement:

---
