# Supplementary material for: Escaping the OR: A Pilot Study of a Jigsaw-Based Workshop to Teach Preoperative Assessment in Internal Medicine Residency
Source: Research Square preprint supplement (doi:10.21203/rs.3.rs-7688150/v1), 2025-11-04
Supplement: Supplementary file 2 [file ae7dee074d48888f216bccc6.xlsx]

## Sheet: Post
POST-GROUP
Control
Questions	Category	Correct	Incorrect	Fraction Correct
Question 1 - MACE	Cardiovascular Risk	1	9	0.1
Question 2 - stents	Cardiovascular Risk	3	7	0.3
Question 3 - DAPT	Cardiovascular Risk	9	1	0.9
Question 4 - med mgmt	Medication Management	8	2	0.8
Question 5 - AI	Medication Management	9	1	0.9
Question 6 - DM (basal)	Medication Management	6	4	0.6
Quetsion 6 - DM (short-acting)	Medication Management	8	2	0.8
Question 7 - SGLT2i 3 days	Medication Management	10	0	1
Question 7 - SGLT2i 4 days	Medication Management	2	8	0.2
Question 8 - RA MTX	Special Population	6	4	0.6
Question 8 - RA HCQ	Special Population	8	2	0.8
Question 8 - RA Leuf	Special Population	6	4	0.6
Question 8 - RA SSA	Special Population	5	5	0.5
Question 9 - CHADS > 4	Anticoagulation	3	7	0.3
Question 9 - MV, CVA	Anticoagulation	8	2	0.8
Question 10 - Warfarin day	Anticoagulation	6	4	0.6
Question 10 - Vitamin K	Anticoagulation	2	8	0.2
Question 11 - Restart Warfarin	Anticoagulation	4	6	0.4
Question 12 - DOAC	Anticoagulation	9	1	0.9
Question 13 - Bariatric	Special Population	2	7	0.222222
Intervention
Questions	Category	Correct	Incorrect	Fraction Correct
Question 1 - MACE	Cardiovascular Risk	2	3	0.4
Question 2 - stents	Cardiovascular Risk	3	2	0.6
Question 3 - DAPT	Cardiovascular Risk	5	0	1
Question 4 - med mgmt	Medication Management	5	0	1
Question 5 - AI	Medication Management	5	0	1
Question 6 - DM (basal)	Medication Management	1	4	0.2
Quetsion 6 - DM (short-acting)	Medication Management	4	1	0.8
Question 7 - SGLT2i 3 days	Medication Management	5	0	1
Question 7 - SGLT2i 4 days	Medication Management	2	3	0.4
Question 8 - RA MTX	Special Population	5	0	1
Question 8 - RA HCQ	Special Population	5	0	1
Question 8 - RA Leuf	Special Population	4	1	0.8
Question 8 - RA SSA	Special Population	5	0	1
Question 9 - CHADS > 4	Anticoagulation	4	1	0.8
Question 9 - MV, CVA	Anticoagulation	1	4	0.2
Question 10 - Warfarin day	Anticoagulation	4	1	0.8
Question 10 - Vitamin K	Anticoagulation	2	3	0.4
Question 11 - Restart Warfarin	Anticoagulation	2	3	0.4
Question 12 - DOAC	Anticoagulation	5	0	1
Question 13 - Bariatric	Special Population	5	0	1

## Sheet: Pre
Pre
Control
Questions	Category	Correct	Incorrect	Fraction Correct
Question 1 - MACE	Cardiovascular Risk	1	10	0.0909091
Question 2 - stents	Cardiovascular Risk	5		0.454545
Question 3 - DAPT	Cardiovascular Risk	9		0.818182
Question 4 - med mgmt	Medication Management	5		0.454545
Question 5 - AI	Medication Management	10		0.909091
Question 6 - DM (basal)	Medication Management	4		0.363636
Quetsion 6 - DM (short-acting)	Medication Management	8		0.727273
Question 7 - SGLT2i 3 days	Medication Management	11		1
Question 7 - SGLT2i 4 days	Medication Management	1		0.0909091
Question 8 - RA MTX	Special Population	8		0.8
Question 8 - RA HCQ	Special Population	8		0.8
Question 8 - RA Leuf	Special Population	3		0.3
Question 8 - RA SSA	Special Population	2		0.2
Question 9 - CHADS > 4	Anticoagulation	2		0.2
Question 9 - MV, CVA	Anticoagulation	7		0.7
Question 10 - Warfarin day	Anticoagulation	6		0.545455
Question 10 - Vitamin K	Anticoagulation	1		0.0909091
Question 11 - Restart Warfarin	Anticoagulation	4		0.363636
Question 12 - DOAC	Anticoagulation	8		0.727273
Question 13 - Bariatric	Special Population	1		0.142857
Pre Intervention
Questions	Category	Correct	Incorrect	Fraction Correct
Question 1 - MACE	Cardiovascular Risk	1		0.1
Question 2 - stents	Cardiovascular Risk	3		0.3
Question 3 - DAPT	Cardiovascular Risk	9		0.9
Question 4 - med mgmt	Medication Management	8		0.8
Question 5 - AI	Medication Management	9		0.9
Question 6 - DM (basal)	Medication Management	6		0.6
Quetsion 6 - DM (short-acting)	Medication Management	8		0.8
Question 7 - SGLT2i 3 days	Medication Management	10		1
Question 7 - SGLT2i 4 days	Medication Management	2		0.2
Question 8 - RA MTX	Special Population	6		0.6
Question 8 - RA HCQ	Special Population	8		0.8
Question 8 - RA Leuf	Special Population	6		0.6
Question 8 - RA SSA	Special Population	5		0.5
Question 9 - CHADS > 4	Anticoagulation	3		0.3
Question 9 - MV, CVA	Anticoagulation	8		0.8
Question 10 - Warfarin day	Anticoagulation	6		0.6
Question 10 - Vitamin K	Anticoagulation	2		0.2
Question 11 - Restart Warfarin	Anticoagulation	4		0.4
Question 12 - DOAC	Anticoagulation	9		0.9
Question 13 - Bariatric	Special Population	2		0.222222
