# Supplementary material for: Escaping the OR: A Pilot Study of a Jigsaw-Based Workshop to Teach Preoperative Assessment in Internal Medicine Residency
Source: Research Square preprint supplement (doi:10.21203/rs.3.rs-7688150/v1), 2025-11-04
Supplement: Supplementary file 4 [file d9762d5116f09a04045b3d6d.xlsx]

## Sheet: Knowledge
Intervention Group Pre-Test (Knowledge)				Intervention Group Post-Test (Knowledge)
Cardio	13/30			Cardio	10	30
Med Mgmt	43/60			Med Mgmt	22	60
Special	33/50			Special	39	50
AC	32/60			AC	18	60
Control Group Pre-Test (Knowledge)				Control Group Post-Test (Knowledge)
Cardio	15/33			Cardio	13/30	0.43
Med Mgmt	39/66			Med Mgmt	43/60	0.716
Special	22/47			Special	27/49	0.55
AC	28/64			AC	32/60	0.53

## Sheet: Confidence
Intervention Group Pre-Test (Confidence)			Intervention Group Post-Test (Confidence)
Ambulatory Preop Assessment	2.375		Ambulatory Preop Assessment	3.66667
Inpatient Preop Assessment	2.25		Inpatient Preop Assessment	2.6
ACC/AHA Guidelines	2.125		ACC/AHA Guidelines	3.2
Bariatric Surgery	1.5		Bariatric Surgery	3.2
CKD	1.625		CKD	3.2
Liver disease	1.75		Liver disease	3
Rheumatology	1.375		Rheumatology	3.4
Control Group Pre-Test (Confidence)			Control Group Post-Test (Confidence)
Ambulatory Preop Assessment	2.38462		Ambulatory Preop Assessment	2.85714
Inpatient Preop Assessment	2.76923		Inpatient Preop Assessment	3
ACC/AHA Guidelines	2.53846		ACC/AHA Guidelines	2.35714
Bariatric Surgery	2.07692		Bariatric Surgery	1.85714
CKD	2.69231		CKD	2.57143
Liver disease	2.23077		Liver disease	2.21429
Rheumatology	1.76923		Rheumatology	1.78571
